# Supplementary material for: Photodimerization of an olefin-containing pyridinium-based metal–organic complex and isomerization of its cyclobutane product upon recrystallization
Source: Royal Society of Chemistry journal article supplement (doi:10.1039/c6ce00724d), 2016-01-01
Supplement: c6ce00724d1.pdf [file c6ce00724d1.pdf]

## Supporting information

### Photodimerization of an olefin-containing pyridinium-based metal–organic complex and isomerization of its cyclobutane product upon recrystallization

Li-Xuan Cai,<sup>a</sup> Cheng Chen,<sup>a</sup> Ya-Jun Zhang,<sup>a</sup> Xiao-Dong Yang<sup>a</sup> and Jie Zhang<sup>\*ab</sup>

<sup>a</sup>State Key Laboratory of Structural Chemistry, Fujian Institute of Research on the Structure of Matter, Chinese Academy of Sciences, Fuzhou, Fujian 350002, P. R. China. E-mail: [zhangjie@fjirsm.ac.cn](mailto:zhangjie@fjirsm.ac.cn)

<sup>b</sup>MOE Key Laboratory of Cluster Science, School of Chemistry, Beijing Institute of Technology, Beijing 100081, P. R. China, E-mail: [zhangjie68@bit.edu.cn](mailto:zhangjie68@bit.edu.cn)

\*\*\*\*\*

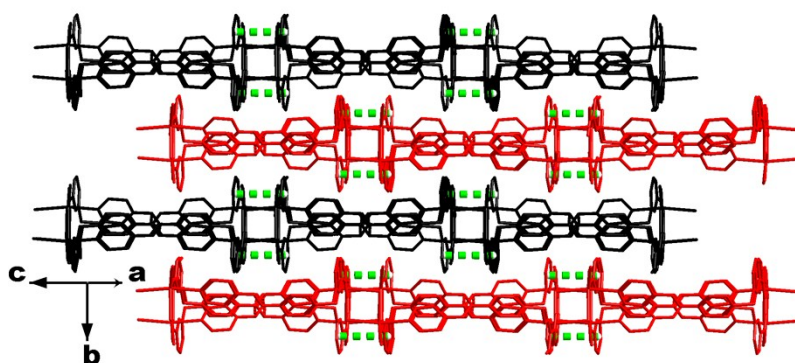

Fig. S1 The -ABAB- stacking of the 1D chains in compound **1** as viewed towards (100) plane.

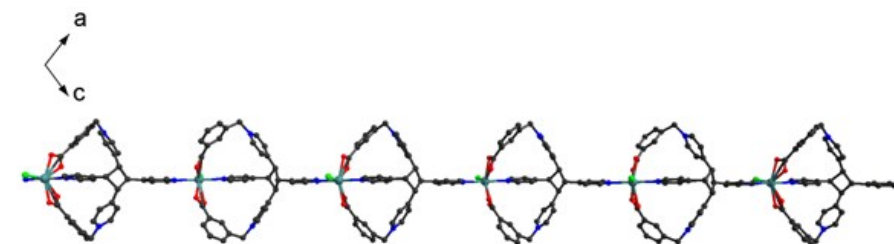

Fig. S2 The 1D coordination polymeric chain in compound **2**.

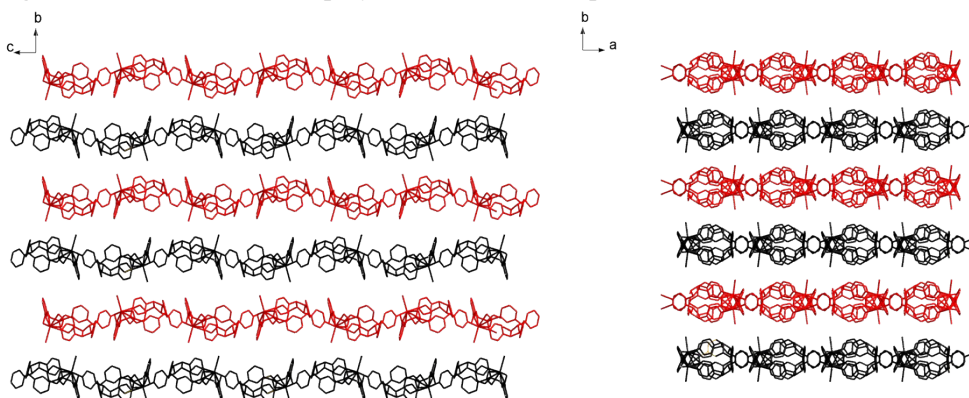

Fig. S3 The -ABAB- packing structure of **2** in the (100) plane (a) and in the (001) plane (b).

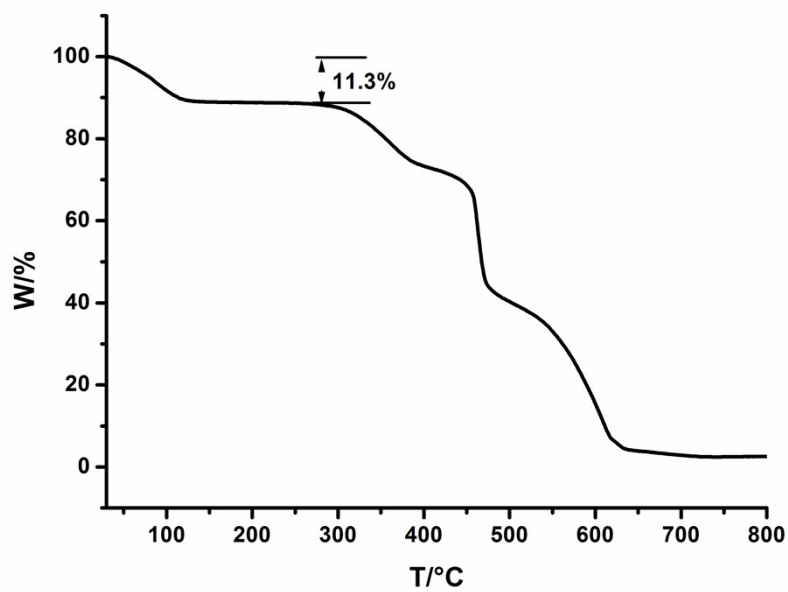

Fig. S4 The TG plot of compound 1.

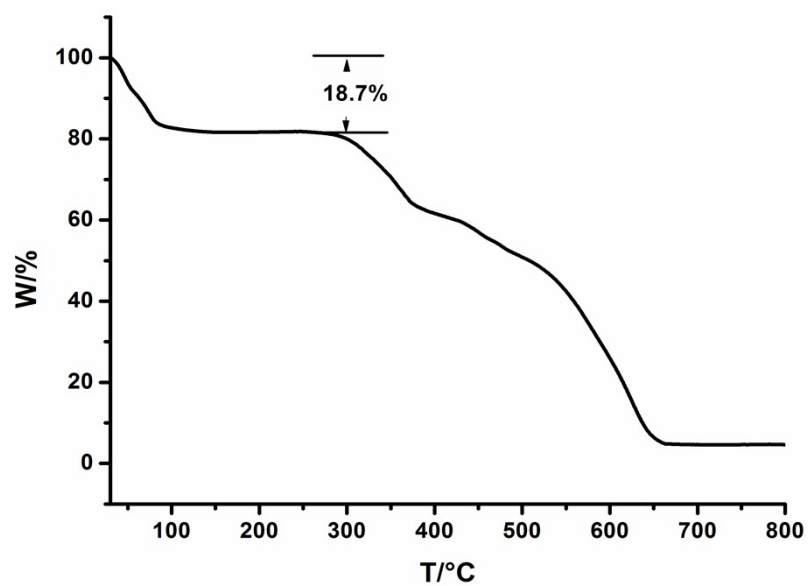

Fig. S5 The TG plot of compound 2.
